# Supplementary material for: Targeting Discoidin Domain Receptor 1 (DDR1) Signaling and Its Crosstalk with β1-Integrin Emerges as a Key Factor for Breast Cancer Chemosensitization upon Collagen Type 1 Binding
Source: MDPI journal article supplement (doi:10.3390/ijms21144956), 2020-07-13

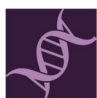

## Supplementary Materials

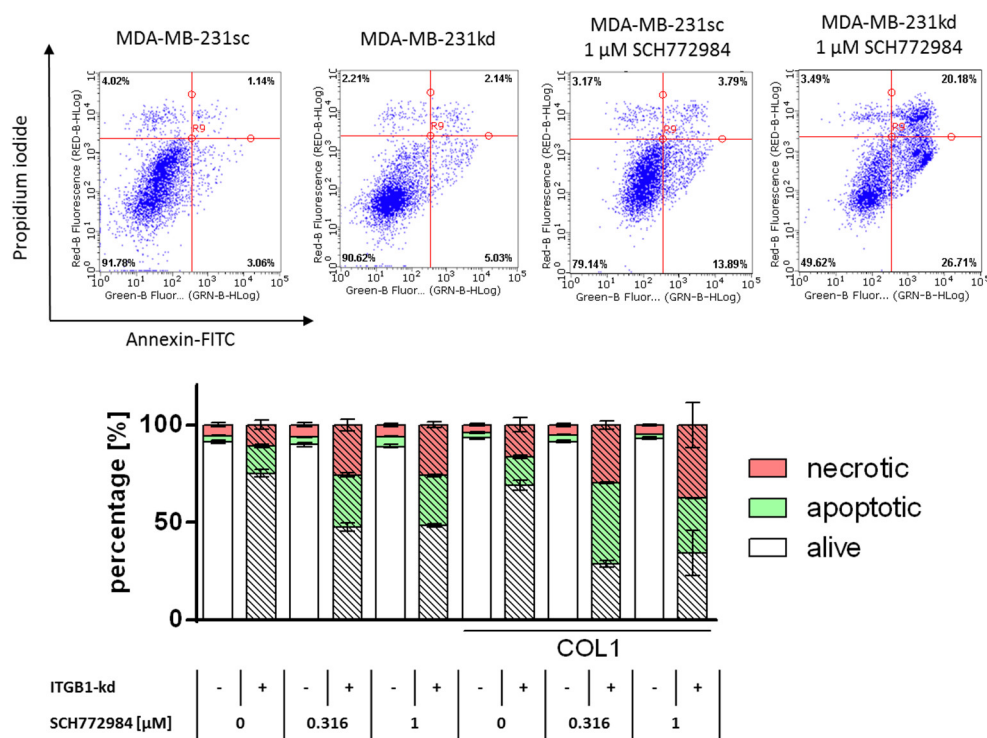

**Figure S1.** Annexin V-FITC/Propidium iodide assay of SCH772984 (0.316  $\mu$ M and 1  $\mu$ M, for 48 h) incubated MDA-MB-231 scrambled (sc) and integrin  $\beta_1$ -knockdown (ITGB1-kd) cells in the presence and absence of collagen type 1 (COL1,  $n$  = at least 3 biological samples).

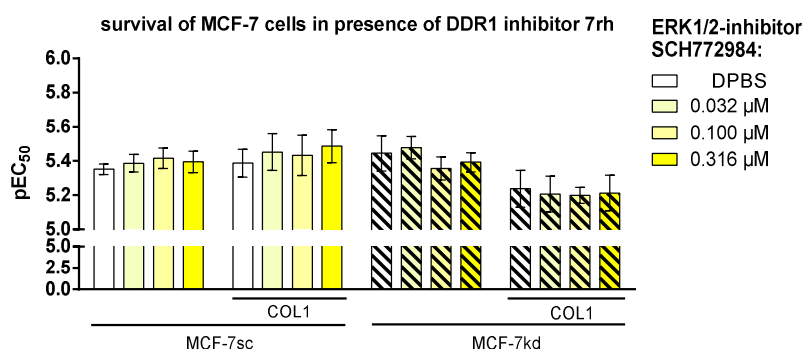

**Figure S2.** Combination effect of 7rh and SCH772984 cytotoxicity in MCF-7 scrambled (sc) and integrin  $\beta_1$ -knockdown (kd) cells in the presence and absence of collagen type 1 (COL1), displayed by the pEC<sub>50</sub> values of 7rh cytotoxicity in dependence of SCH772984 ( $n$  = at least 3 biological samples). MCF-7 cells showed no sensitization upon this combination treatment. Statistical analysis was performed via unpaired t-test.

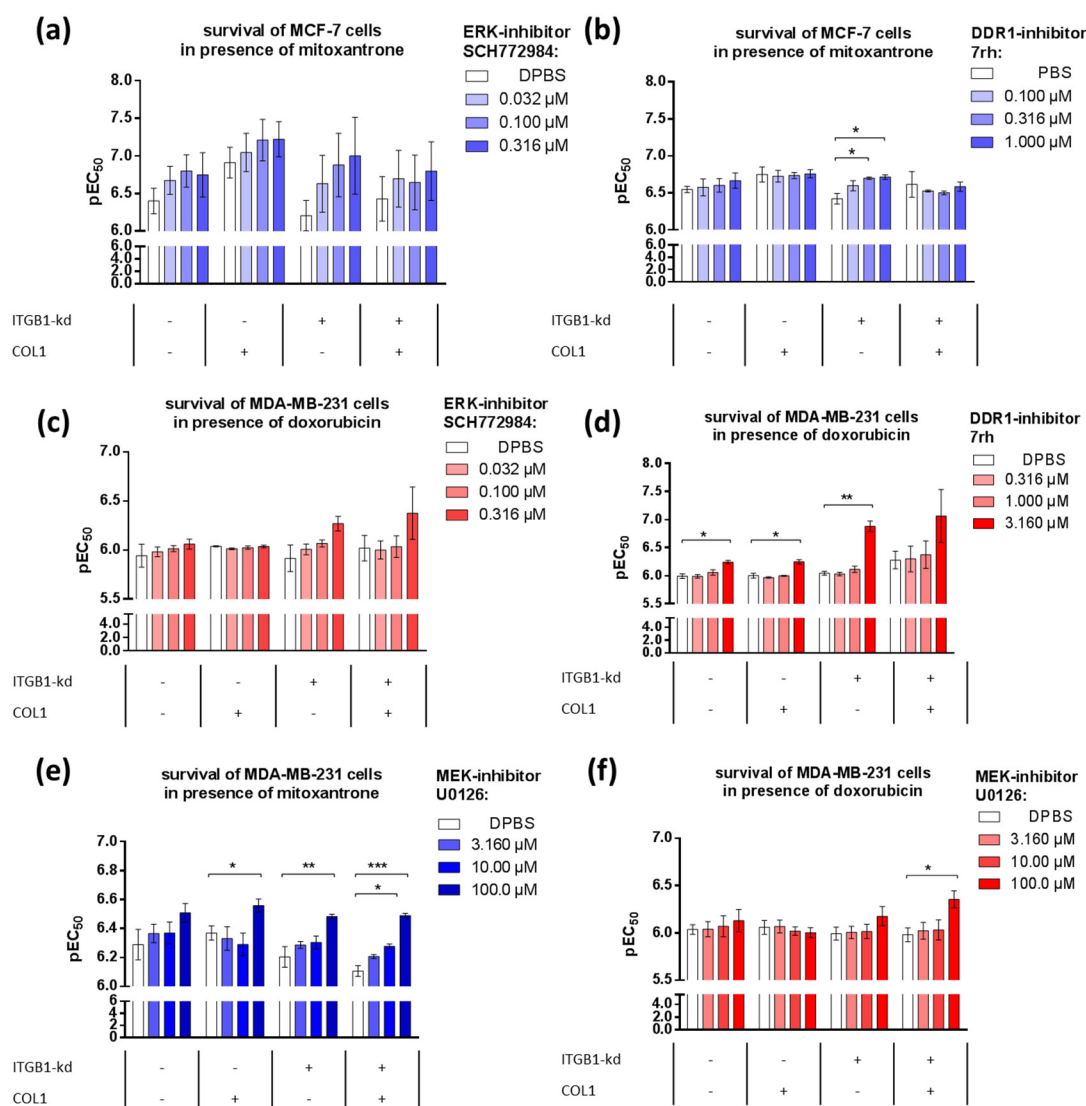

**Figure S3.** The impact of ERK1/2, MEK1/2 and DDR1-inhibitors on the cytotoxic treatment of MDA-MB-231 and MCF-7 scrambled and integrin  $\beta$ 1-knockdown (ITGB1-kd) cells with doxorubicin or mitoxantrone in combinatory approaches in the presence and absence of collagen type 1 (COL1). **(a,b)** The ERK1/2-inhibitor SCH772984 **(a)** and DDR1-inhibitor 7rh **(b)** were combined with mitoxantrone in MCF-7 cells. **(c,d)** The ERK1/2-inhibitor SCH772984 **(c)** and DDR1-inhibitor 7rh **(d)** were combined with doxorubicin in MDA-MB-231 cells. **(e,f)** The MEK1/2-inhibitor U0126 was combined with **(e)** mitoxantrone and **(f)** doxorubicin in MDA-MB-231 cells. The cytostatics were applied in increasing concentrations to gain a pEC<sub>50</sub> value. The inhibitors were additionally added at a constant concentration. Shown are means of pEC<sub>50</sub> values and statistical analysis was performed using unpaired t-test (\* $p < 0.05$ ; \*\* $p < 0.01$ ,  $n = 3$  biological samples).

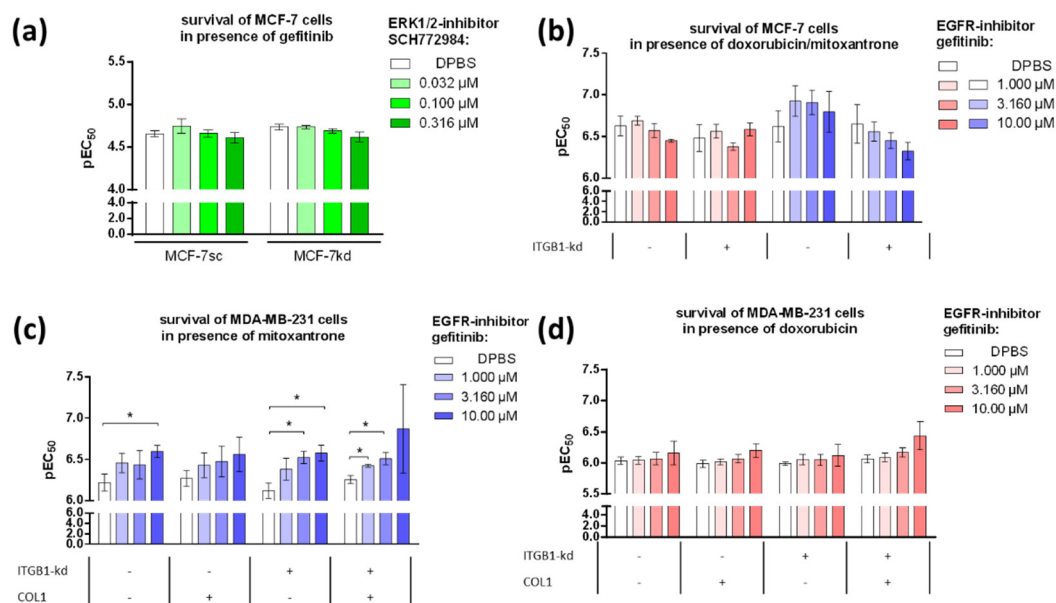

**Figure S4.** (a) Survival of MCF-7 scrambled (sc) and integrin  $\beta_1$ -knockdown (ITGB1-kd) cells in the presence of gefitinib in dependence of SCH772984. Inhibition of EGFR by gefitinib had no further synergistic effect with ERK1/2-inhibition in MCF-7 cells. (b) Survival of MCF-7 and (c,d) MDA-MB-231 sc and kd cells in the presence and absence of collagen type 1 (COL1). The cells were incubated with mitoxantrone or doxorubicin in dependence of EGFR inhibitor gefitinib. Statistical analysis was performed via unpaired t-test ( $n$  = at least 3 biological samples,  $*p < 0.05$ ).

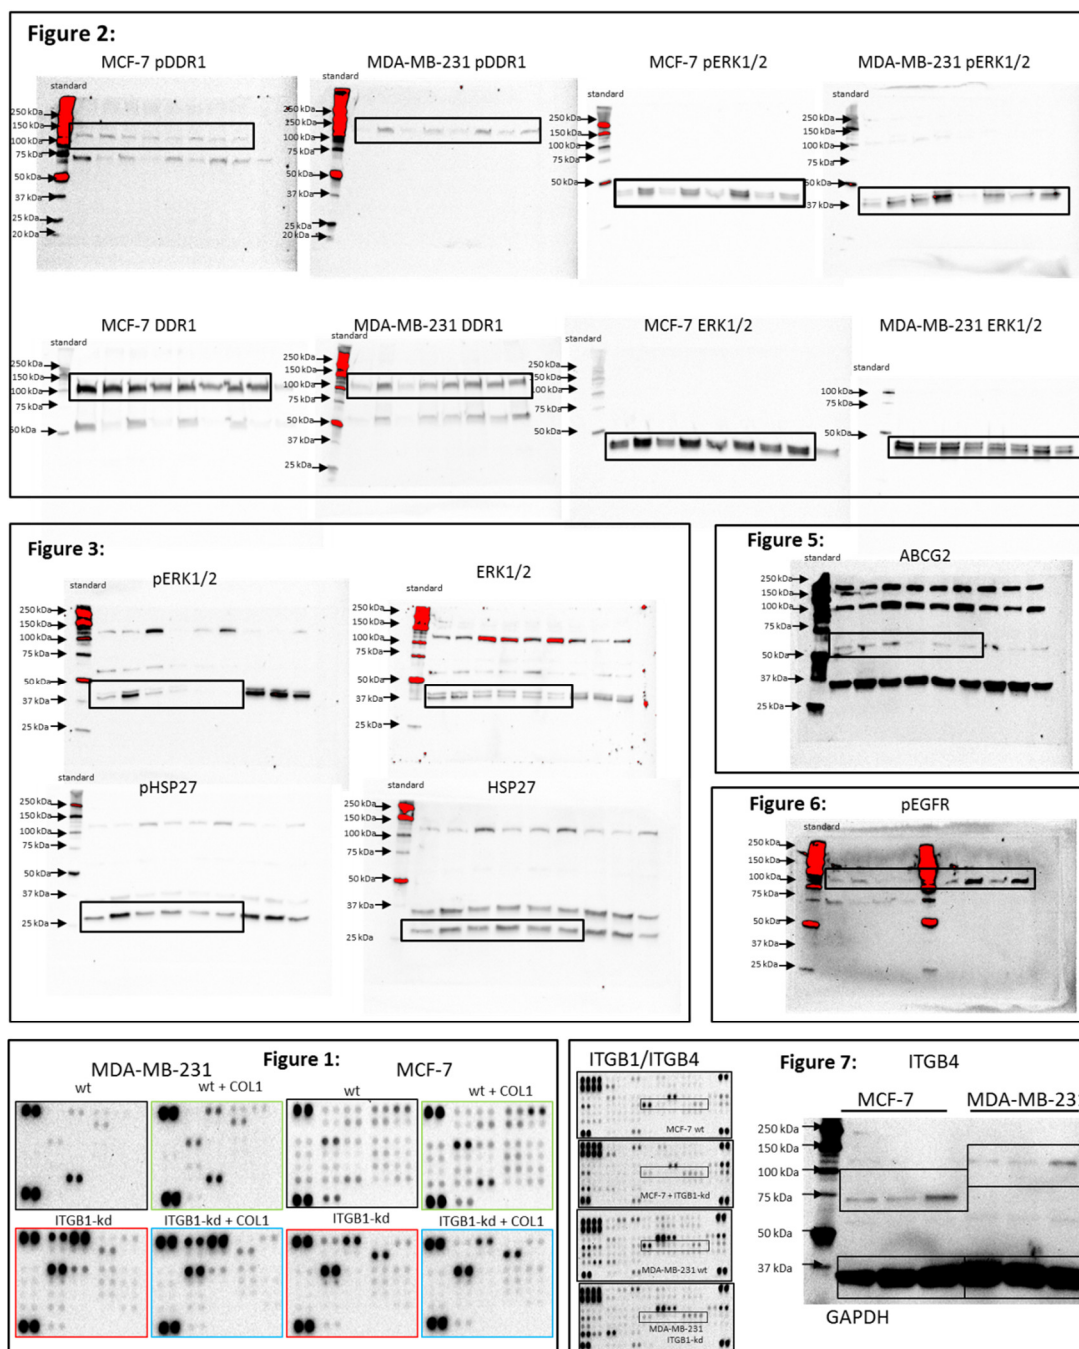

**Figure S5:** Representative uncut Western blots and proteome profiler arrays, which are partly shown in Figures 1–7.

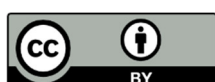

Supplement: s1 [file s1]
